# Supplementary material for: Optimization of ZnO Nanorods Growth on Polyetheresulfone Electrospun Mats to Promote Antibacterial Properties
Source: PubMed Central journal article supplement (PMC7180436; doi:10.3390/molecules25071696), 2020-04-07
Supplement: molecules-25-01696-s001.pdf [file molecules-25-01696-s001.pdf]

1 Article

2 **Optimization of ZnO Nanorods Growth on**  
 3 **Polyethersulfone Electrospun Mats to Promote**  
 4 **Antibacterial Properties**

5 Mario Salmeri <sup>1</sup>, Giulia Ognibene <sup>2</sup>, Lorena Saitta <sup>2</sup>, Cinzia Lombardo <sup>1</sup>, Carlo Genovese <sup>1,3</sup>,  
 6 Matteo Barcellona <sup>4</sup>, Alessandro D'Urso <sup>4</sup>, Luca Spitaleri <sup>4</sup>, Ignazio Blanco <sup>2</sup>, Gianluca Cicala <sup>2</sup>,  
 7 Antonino Gulino <sup>4</sup> and Maria Elena Fragalà <sup>4,\*</sup>

8 <sup>1</sup> Dipartimento di Scienze Biomediche e Biotecnologiche, Università degli Studi di Catania, Torre Biologica  
 9 via S. Sofia, 97, 95123 Catania, Italy; msalmeri@unict.it (M.S.); cinzialombardo@hotmail.com (C.L.);  
 10 [carlo.genovese@studium.unict.it](mailto:carlo.genovese@studium.unict.it) (C.G.)

11 <sup>2</sup> Dipartimento di Ingegneria Civile ed Architettura (DICAR) and UdR-Catania Consorzio INSTM, Università  
 12 degli Studi di Catania, Viale Andrea Doria 6, 95125 Catania, Italy; giuliaognibene@live.com (G.O.);  
 13 [lorena.saitta@phd.unict.it](mailto:lorena.saitta@phd.unict.it) (L.S.); [iblanco@unict.it](mailto:iblanco@unict.it) (I.B.); [gicala@unict.it](mailto:gicala@unict.it) (G.C.);

14 <sup>3</sup> Nacture S.r.l. - Spin-off Università degli Studi di Catania; 95123 Catania, Italy

15 <sup>4</sup> Dipartimento di Scienze Chimiche (DSC) and Consorzio INSTM UdR-Catania, Università degli Studi di  
 16 Catania, Viale Andrea Doria, 6 95125 Catania; [matteo.barcellona@studium.unict.it](mailto:matteo.barcellona@studium.unict.it) (M.B.); [adurso@unict.it](mailto:adurso@unict.it)  
 17 (A.D.); [luca.spitaleri@phd.unict.it](mailto:luca.spitaleri@phd.unict.it) (L.S.); [agulino@unict.it](mailto:agulino@unict.it) (A.G.); [me.fragala@unict.it](mailto:me.fragala@unict.it) (M.E.F)

18 \* Correspondence: [me.fragala@unict.it](mailto:me.fragala@unict.it); Tel.: +39-095-7385149

19 Academic Editors: Keith M. Forward and Jiashen Li

20 **ZnO Chemical Bath Deposition on PES electrospun mats**

21 3D printed support was used both for mats seeding and CBD procedures, as shown in Figure  
 22 S1.

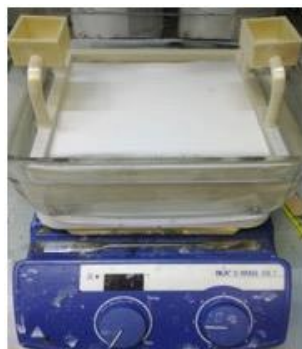

23

24 **Figure S1.** Supported PES mat immersed in seeding bath.

25 The support was made by using a high temperature thermoplastic blend consisting of  
 26 Polyetherimide (PEI) with a Polycarbonate copolymer (Ultem 9085<sup>TM</sup> -Tan grade) and it was  
 27 designed by Solidworks® (Figure S2). It was realized by using Fortus 3D printer (Fortus 400mc-Stratasys,  
 28 Los Angeles, USA) and printing volume was 355 x 254 x 254 mm.

29

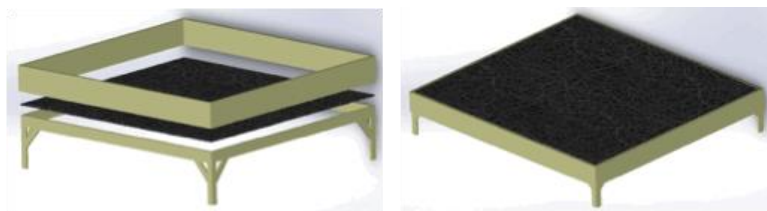

30

31

**Figure S2.** Ultem 9085™ support rendering.
